# Supplementary material for: Facial selectivity induced by N-aryl atropisomerism in benzonitrile oxide cycloadditions with 4-methylene-2-oxazolidinones
Source: Royal Society of Chemistry journal article supplement (doi:10.1039/c2ob25271f), 2012-01-01

Variable Temperature NMR –Compound **3f**

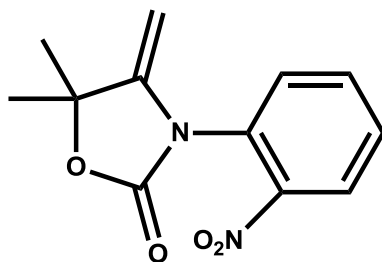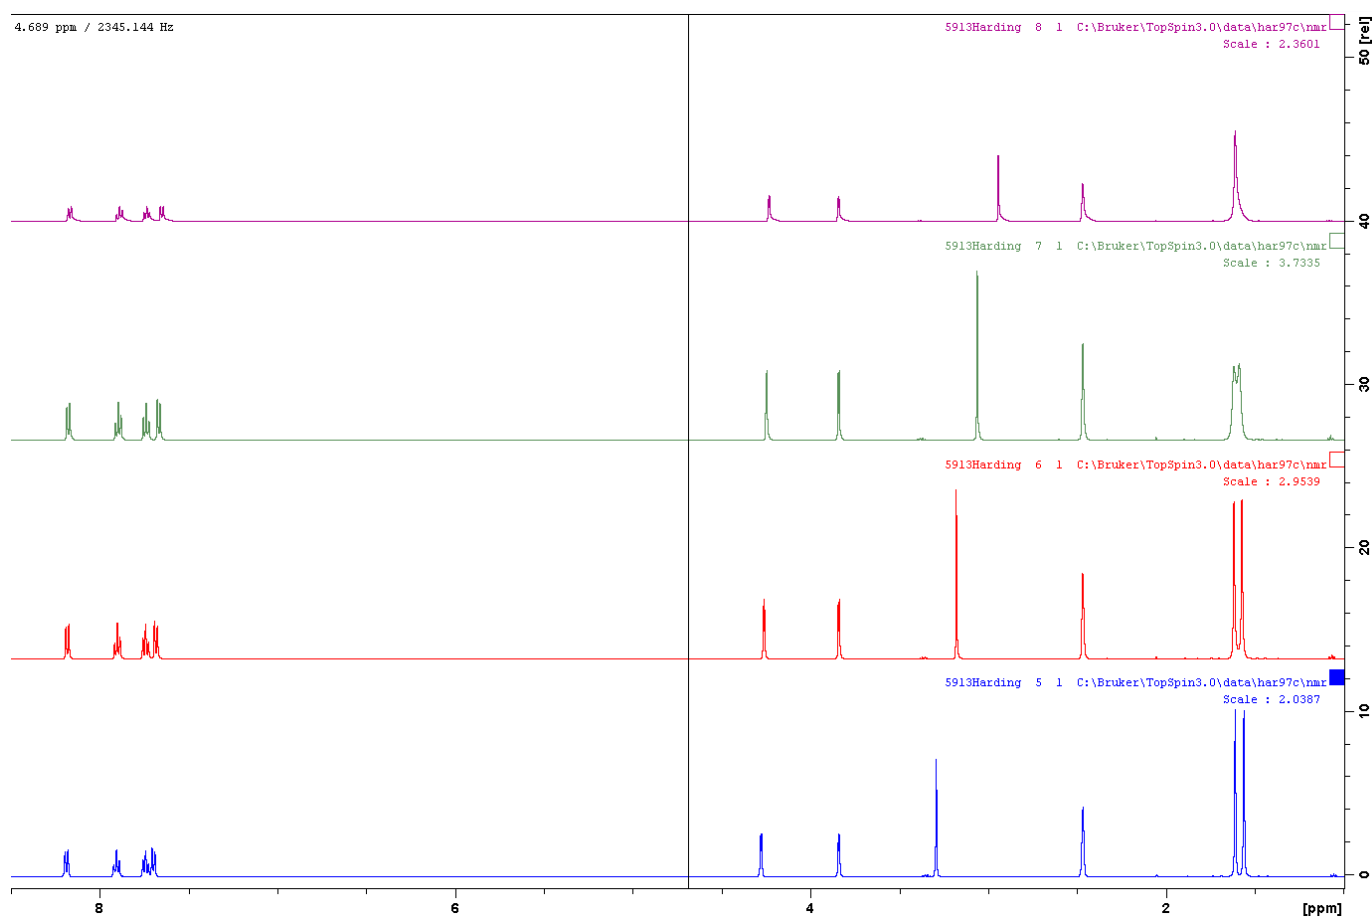

Key – Blue (25 °C), Red (50 °C), Green (75 °C), Purple (100 °C)

Dissolved in  $d^6$  DMSO 25 °C to 100 °C

Expansion of methyl region including solvent peak:

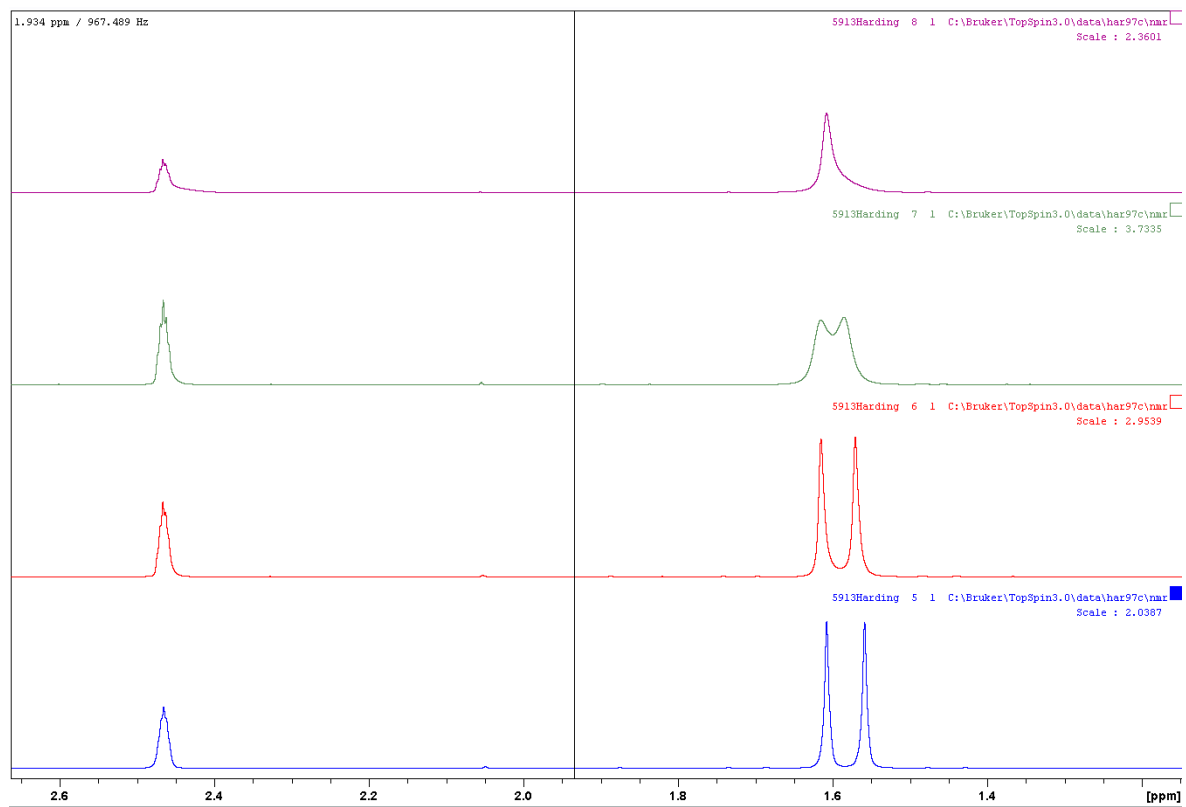

Supplement: c2ob25271f.pdf [file c2ob25271f.pdf]
